# Supplementary material for: Externally sensitized deprotection of PPG-masked carbonyls as a spatial proximity probe in photoamplified detection of binding events
Source: Royal Society of Chemistry journal article supplement (doi:10.1039/c2pp05326h), 2012-01-18

Externally Sensitized Deprotection of PPGs as a Spatial Proximity Probe. Gustafson, T.P.; Metzel, G.A.; Kutateladze, A.G.S1

## **Externally Sensitized Deprotection of PPG-Masked Carbonyls as a Spatial Proximity Probe in Photoamplified Detection of Binding Events.**

Tiffany P. Gustafson, Greg A. Metzel, and Andrei G. Kutateladze\*

*Department of Chemistry and Biochemistry, University of Denver, Denver, CO 80208.*

## **Supporting Information**

### **(NMR SPECTRA)**

Externally Sensitized Deprotection of PPGs as a Spatial Proximity Probe. Gustafson, T.P.; Metzel, G.A.; Kutateladze, A.G.S2

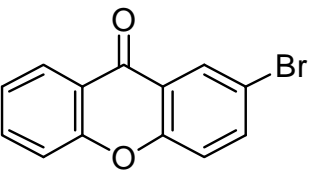

3

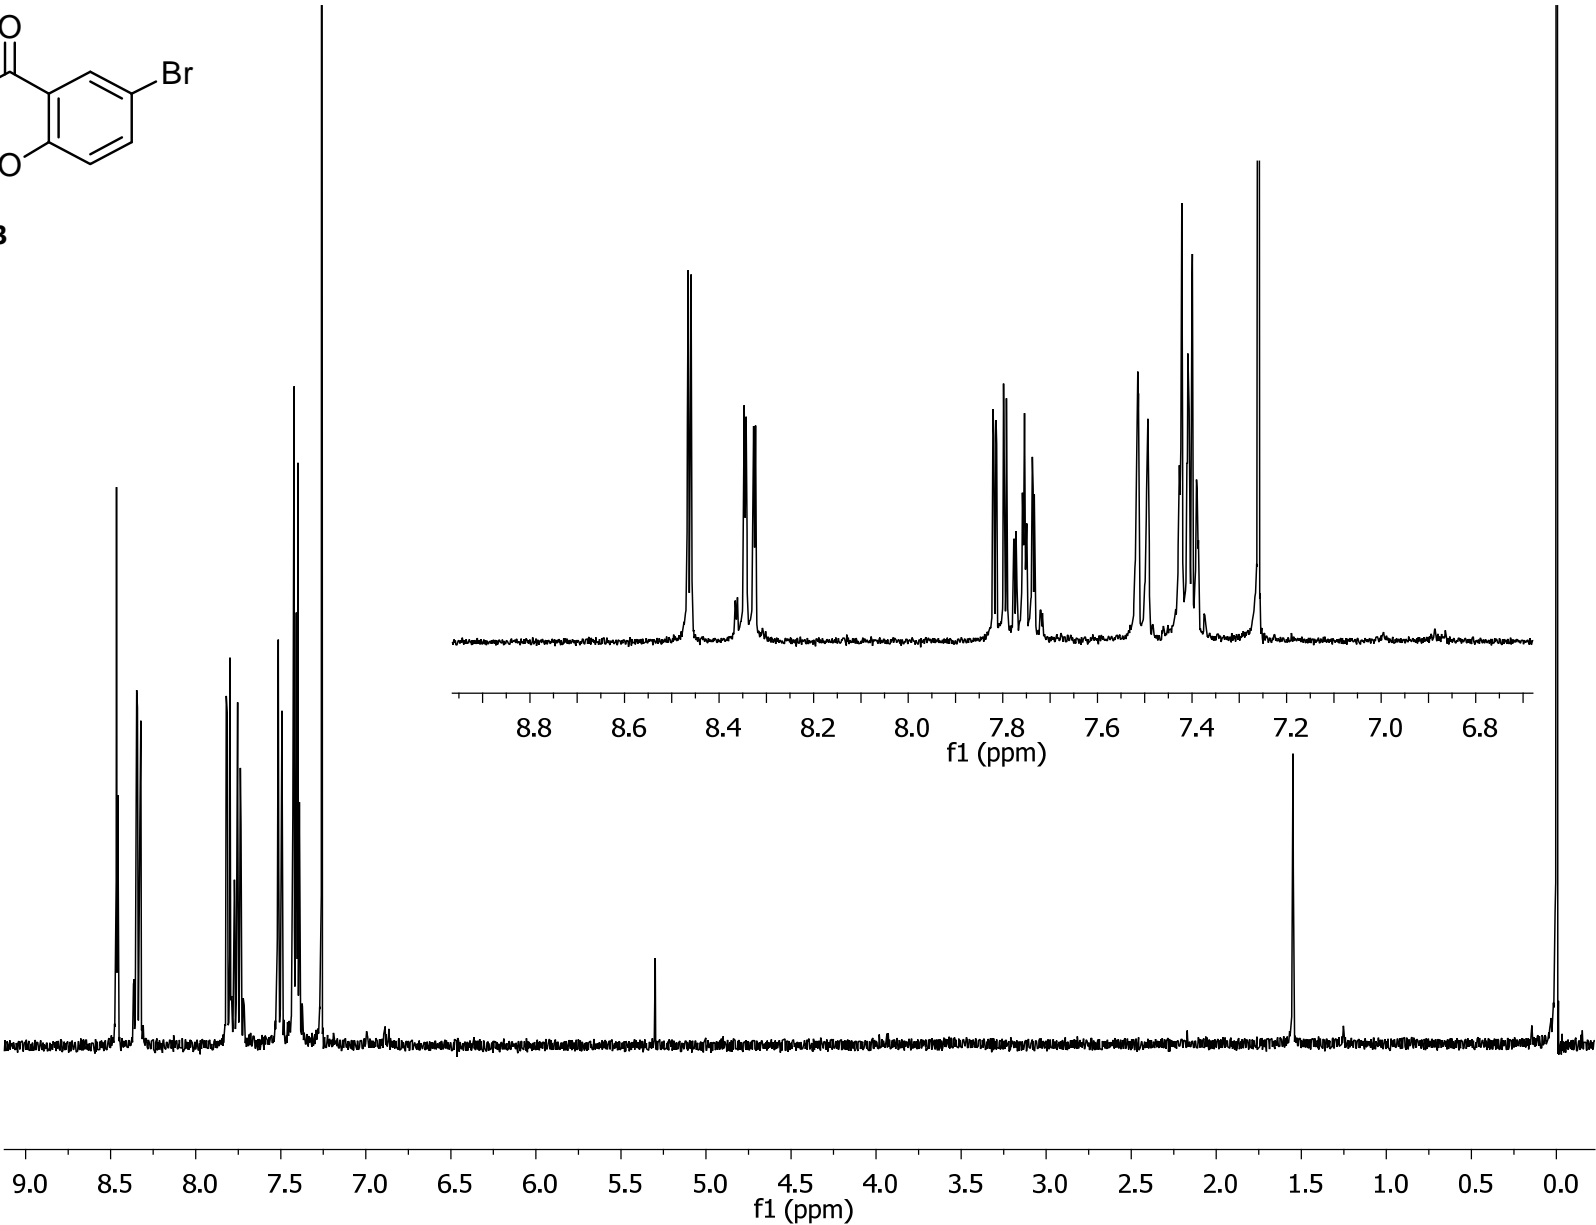

Externally Sensitized Deprotection of PPGs as a Spatial Proximity Probe. Gustafson, T.P.; Metzel, G.A.; Kutateladze, A.G.S3

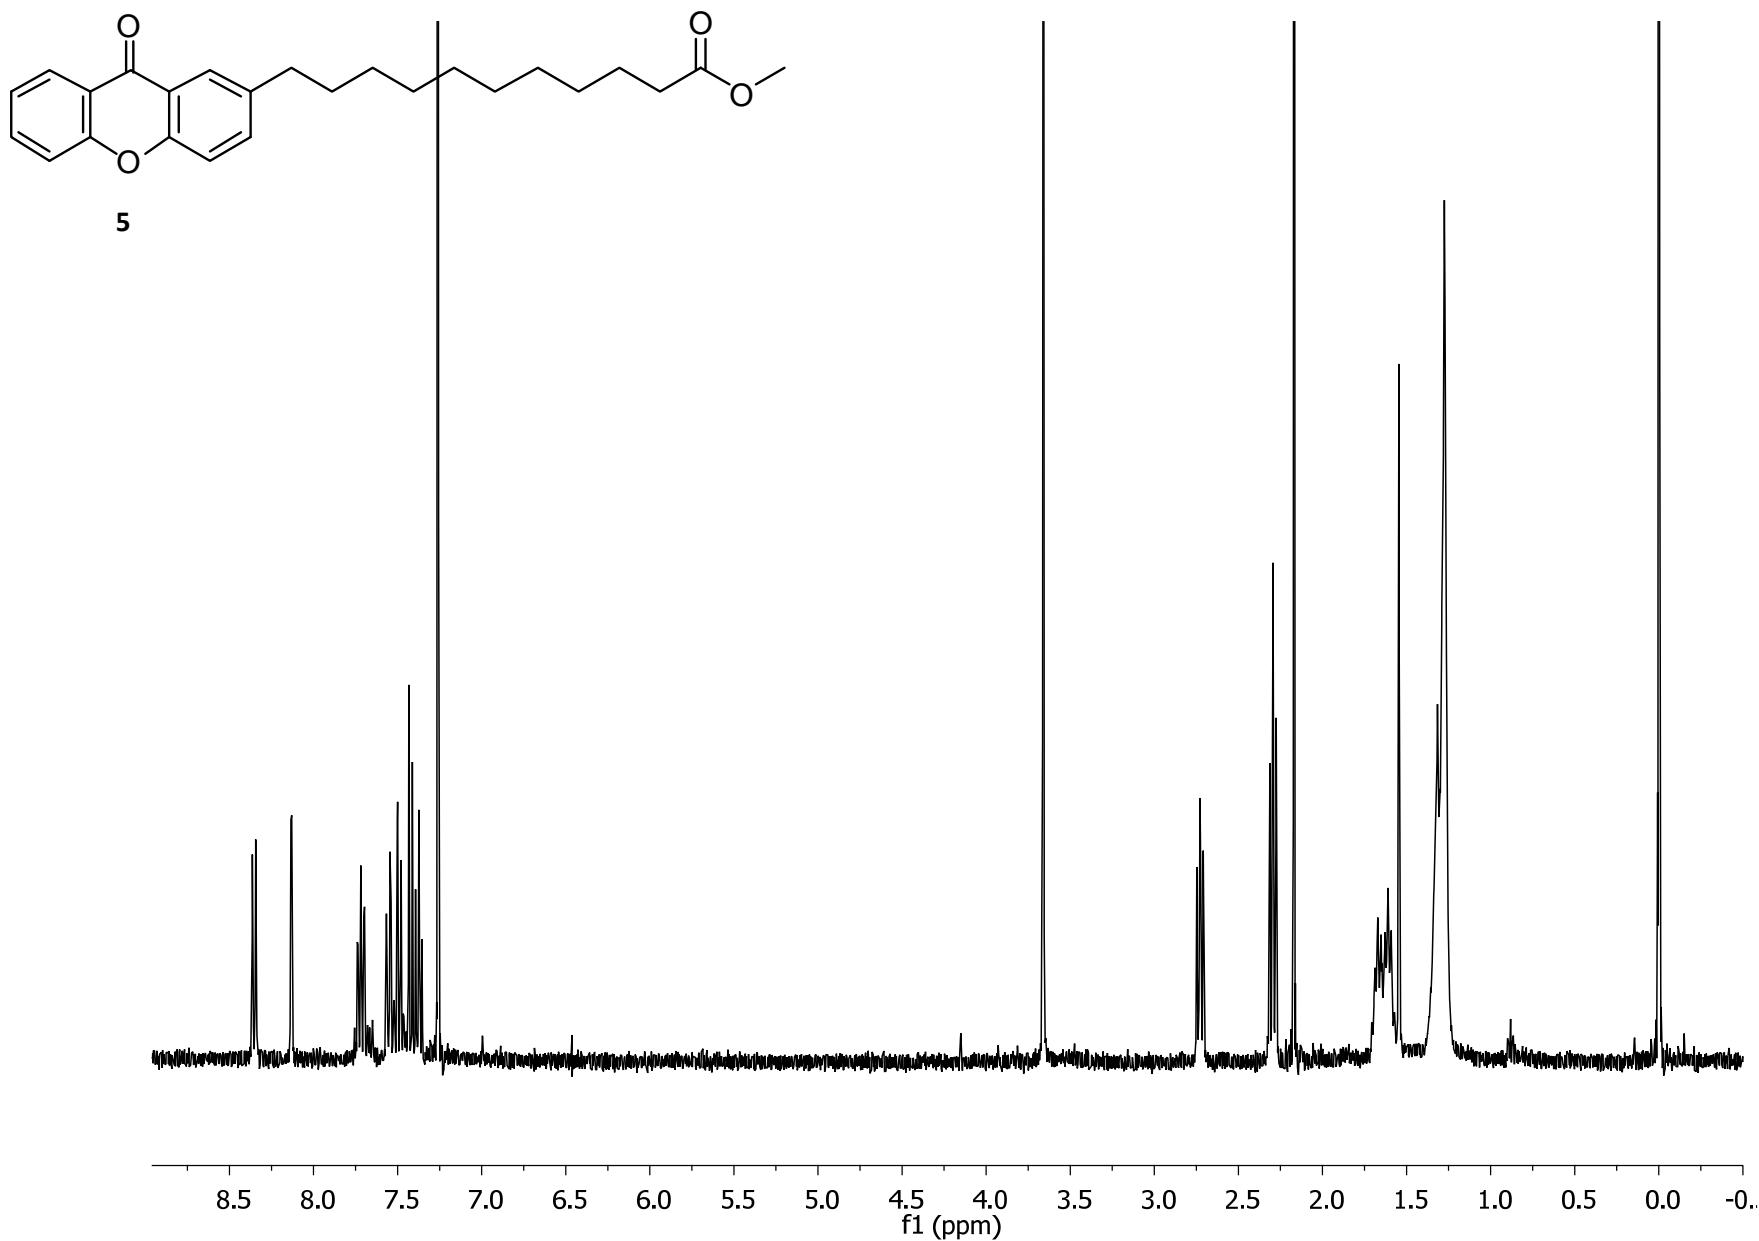

Externally Sensitized Deprotection of PPGs as a Spatial Proximity Probe. Gustafson, T.P.; Metzel, G.A.; Kutateladze, A.G.S4

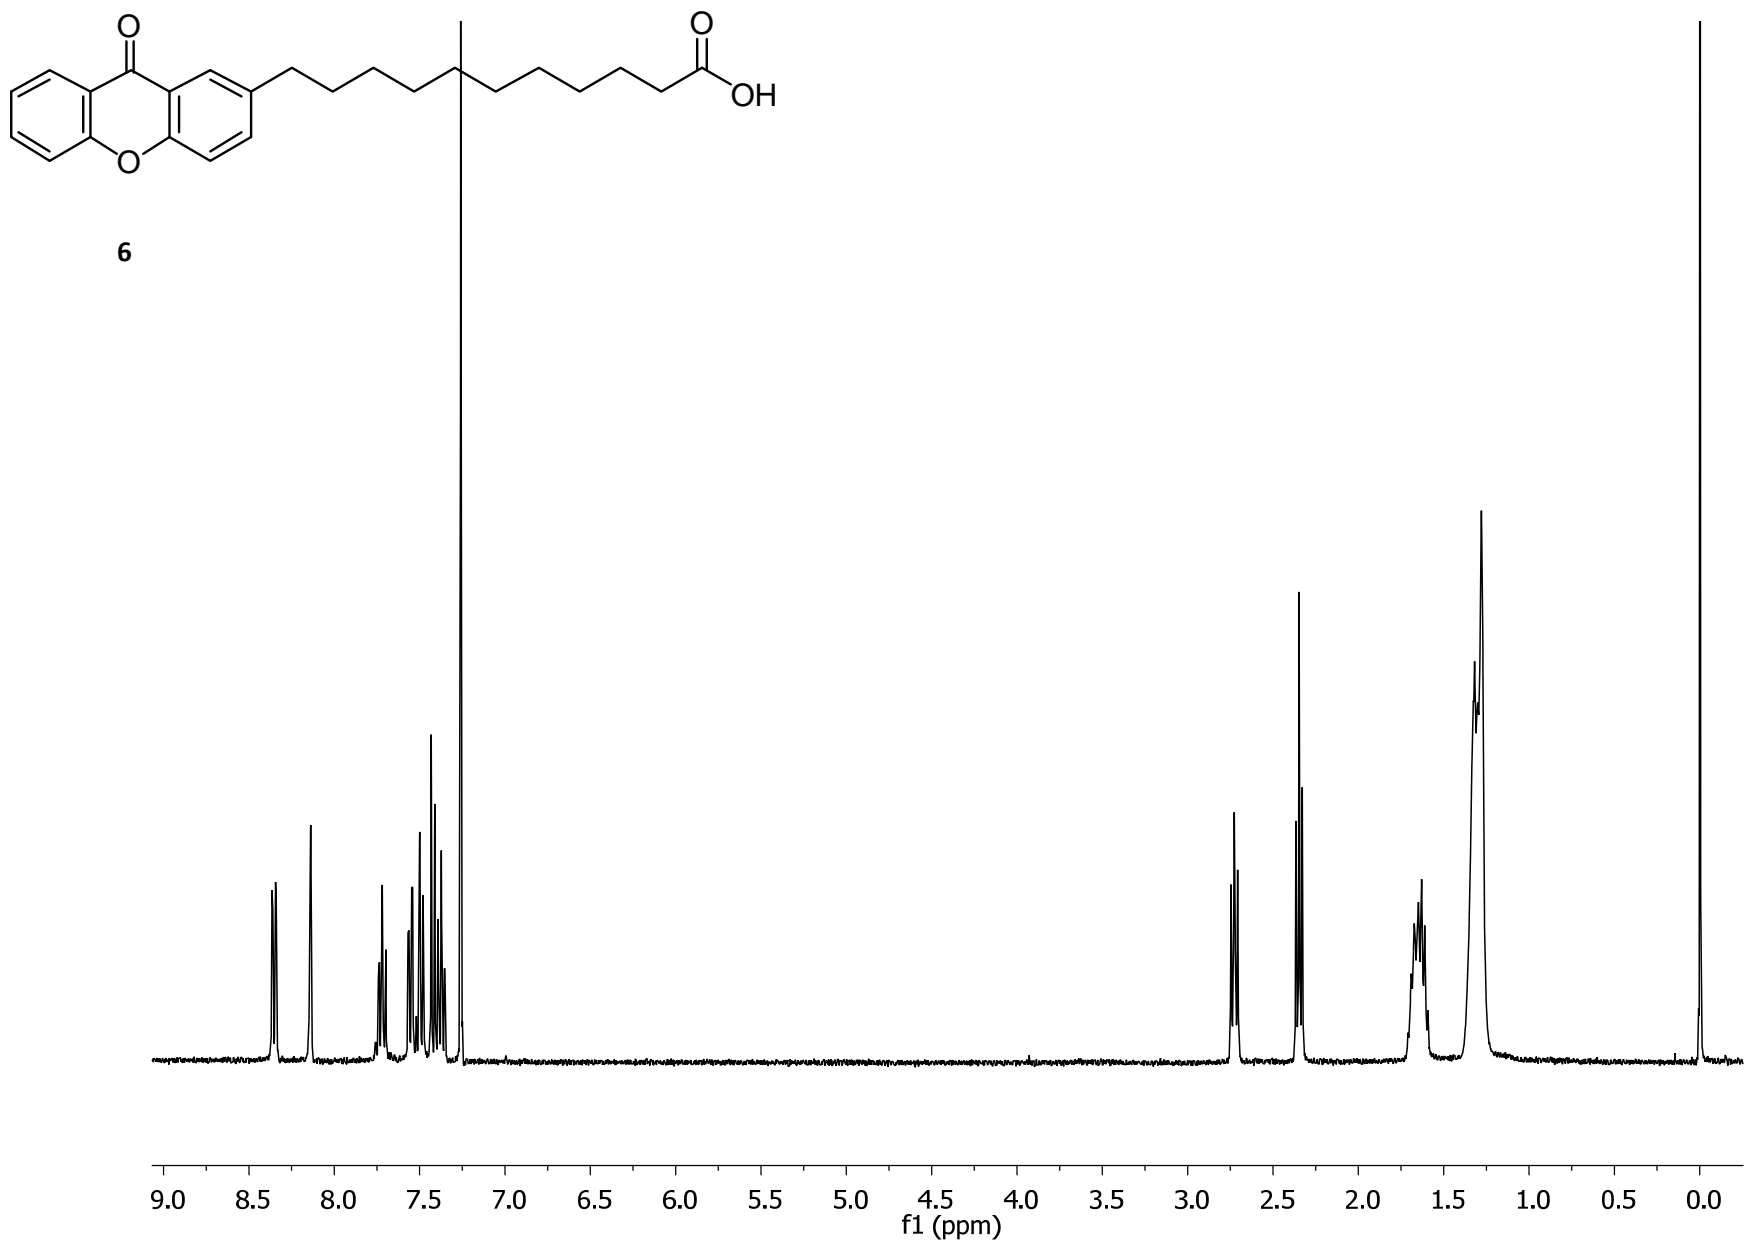

Externally Sensitized Deprotection of PPGs as a Spatial Proximity Probe. Gustafson, T.P.; Metzel, G.A.; Kutateladze, A.G.S5

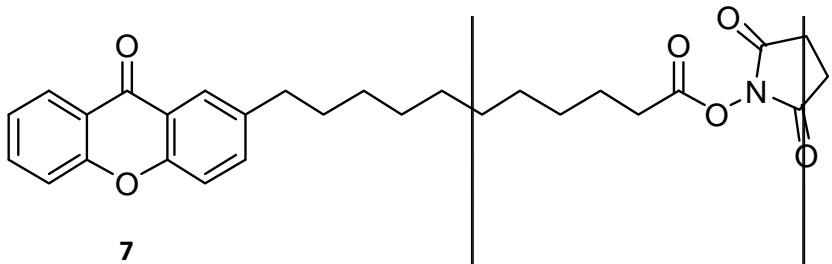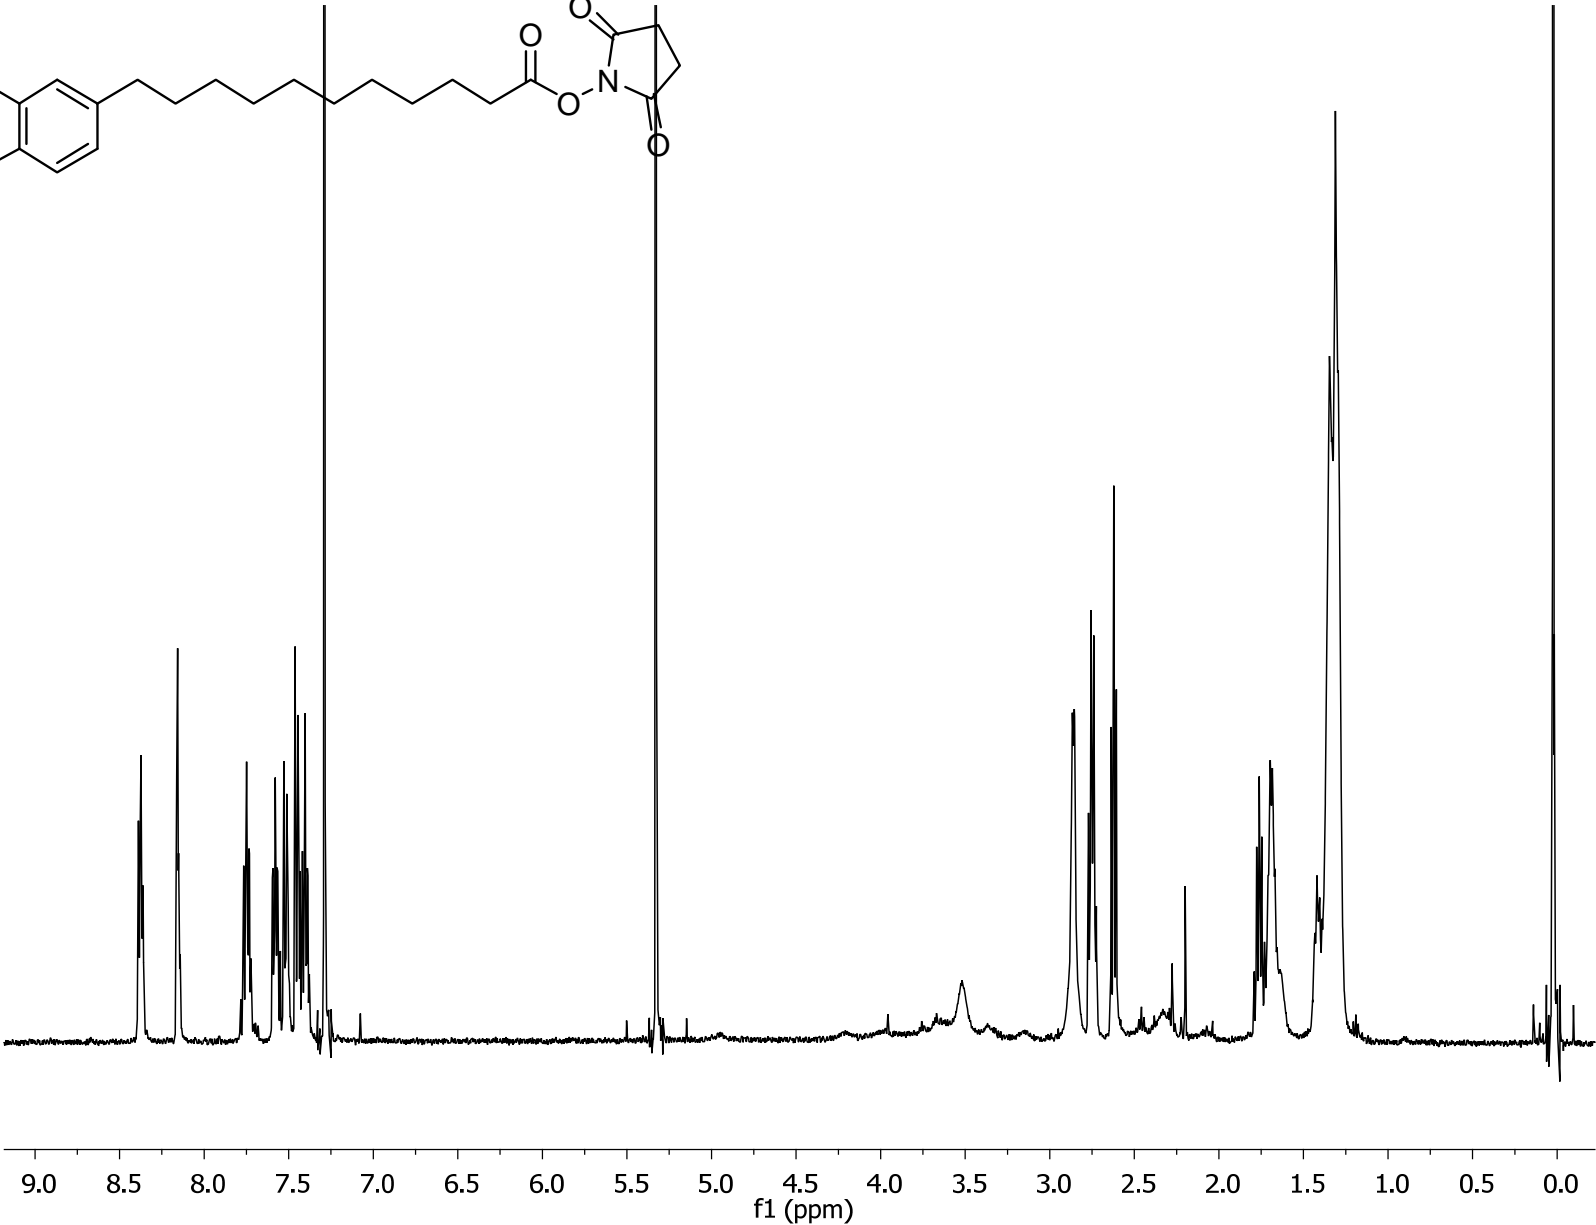

Externally Sensitized Deprotection of PPGs as a Spatial Proximity Probe. Gustafson, T.P.; Metzel, G.A.; Kutateladze, A.G.S6

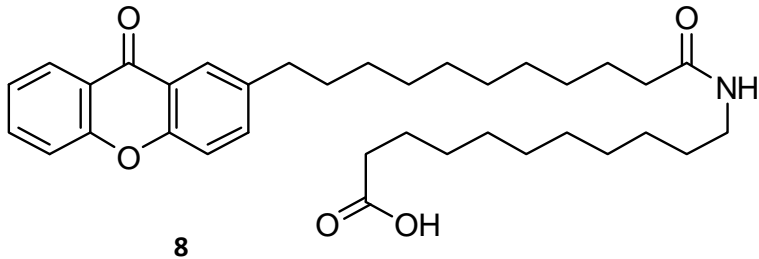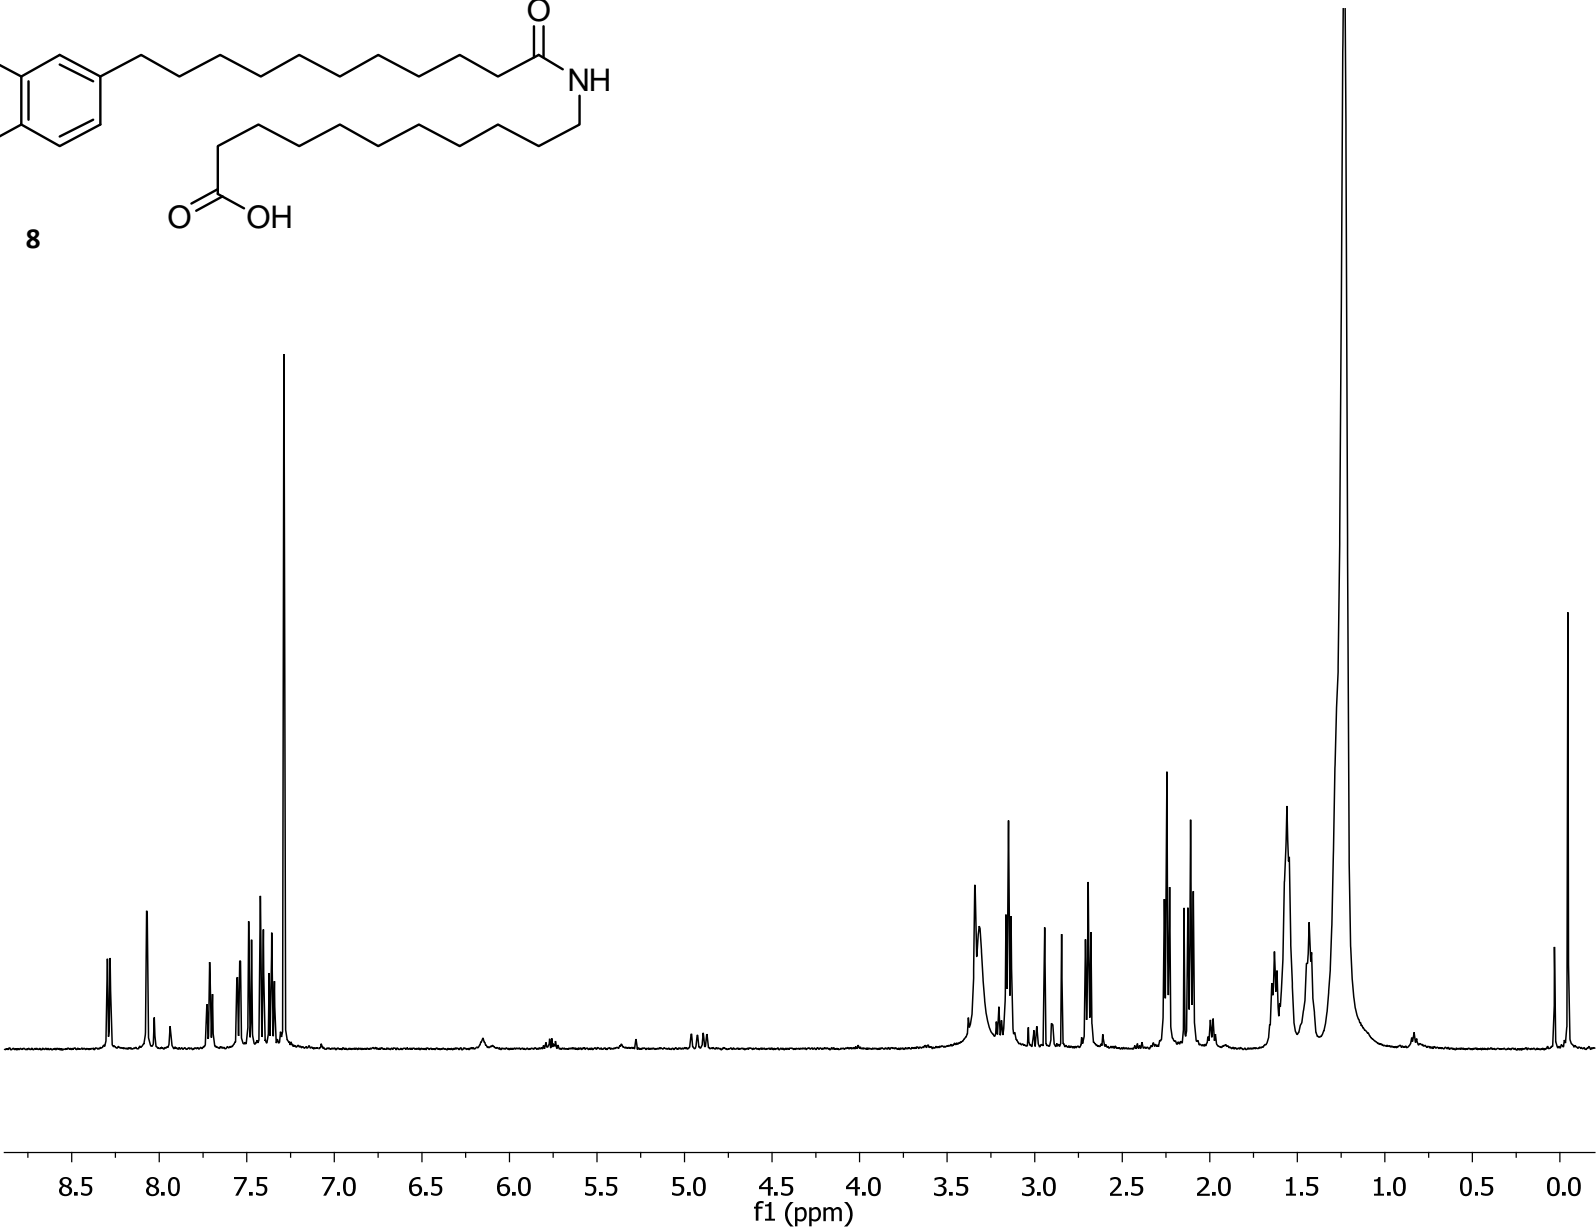

Externally Sensitized Deprotection of PPGs as a Spatial Proximity Probe. Gustafson, T.P.; Metzel, G.A.; Kutateladze, A.G.S7

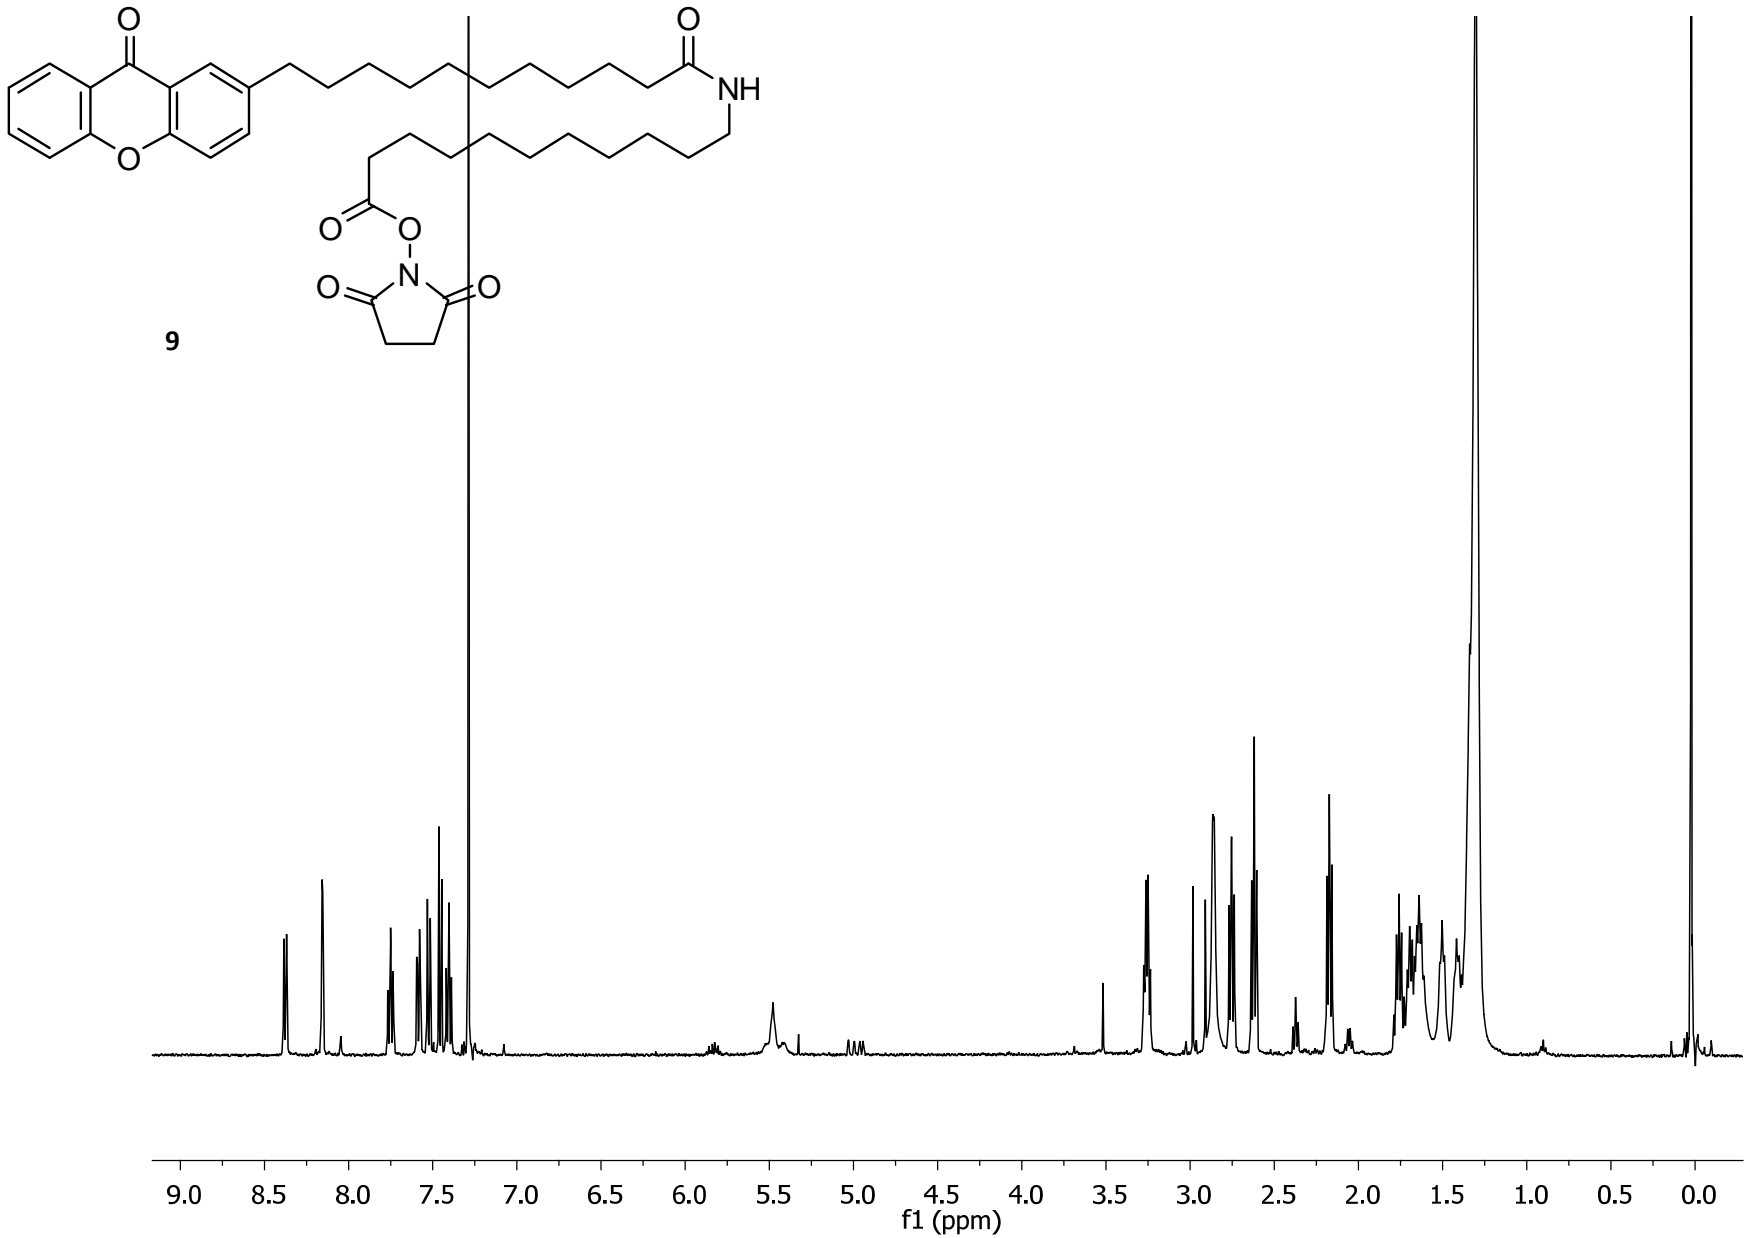

Externally Sensitized Deprotection of PPGs as a Spatial Proximity Probe. Gustafson, T.P.; Metzel, G.A.; Kutateladze, A.G.S8

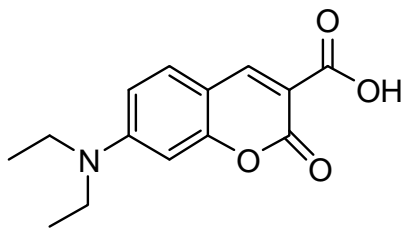

10

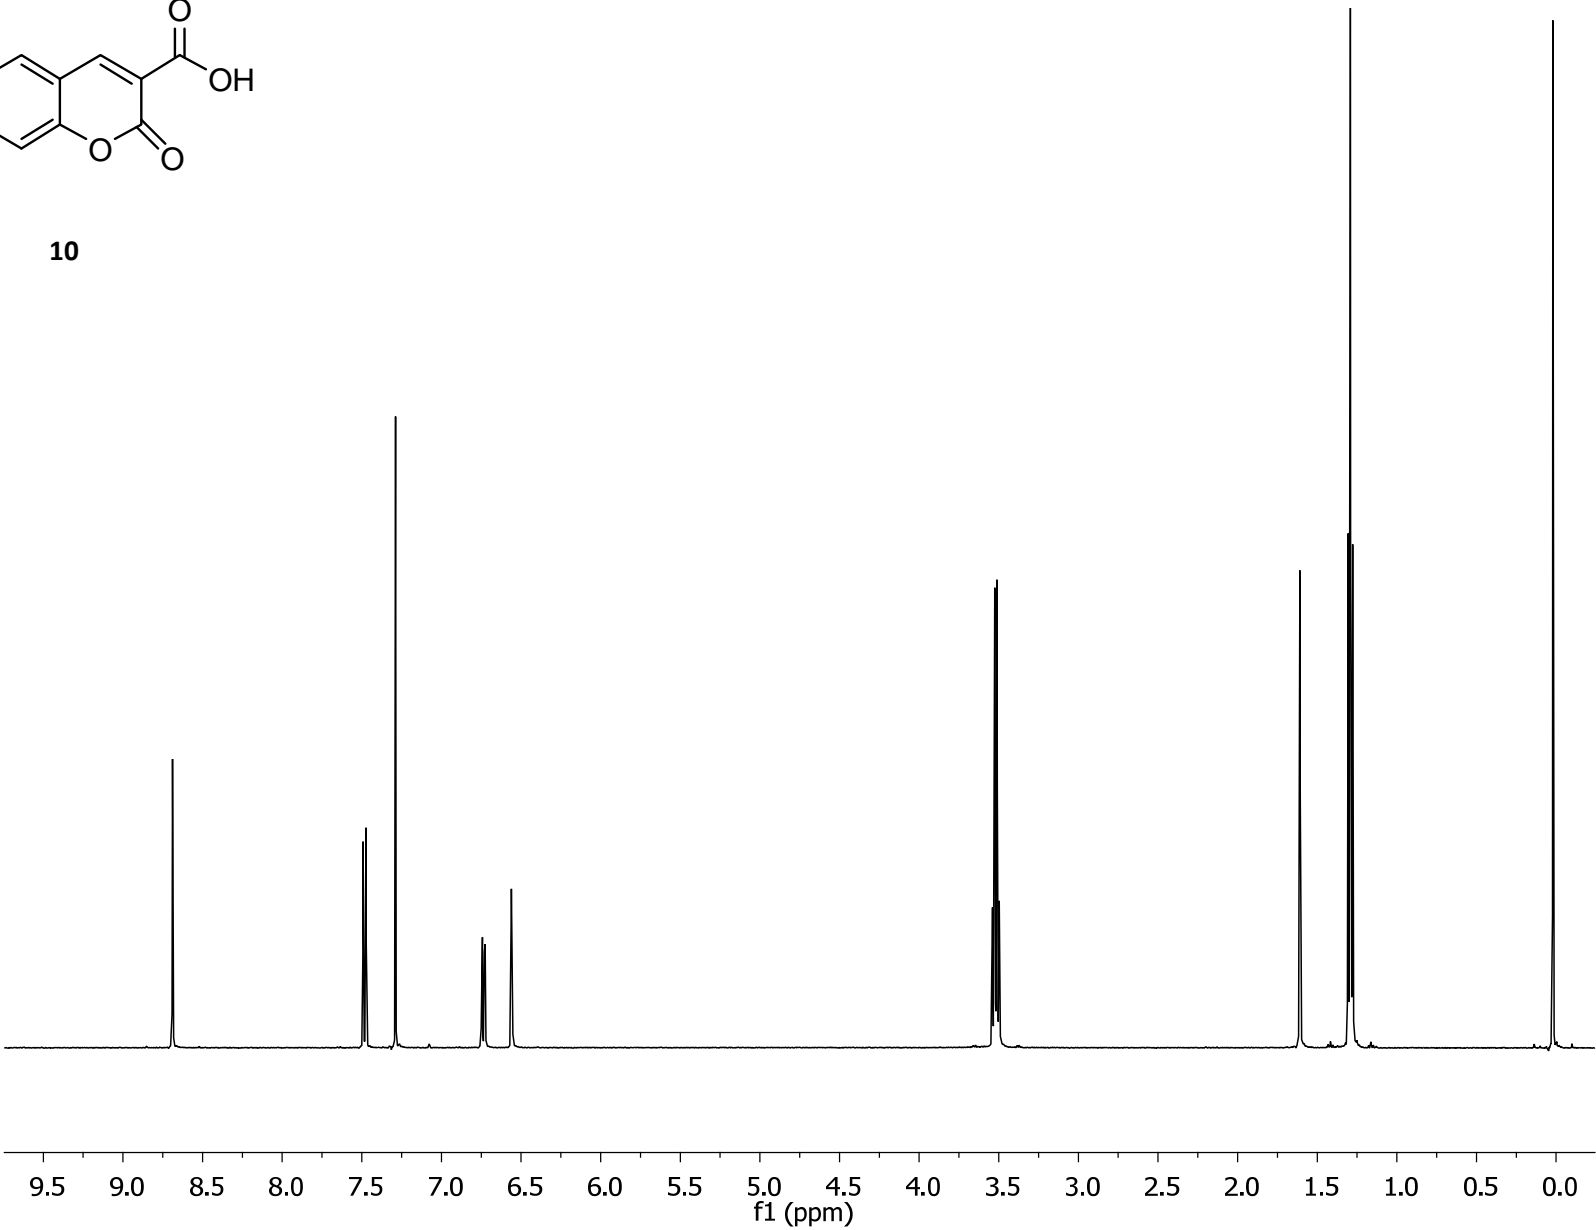



Externally Sensitized Deprotection of PPGs as a Spatial Proximity Probe. Gustafson, T.P.; Metzel, G.A.; Kutateladze, A.G.S9

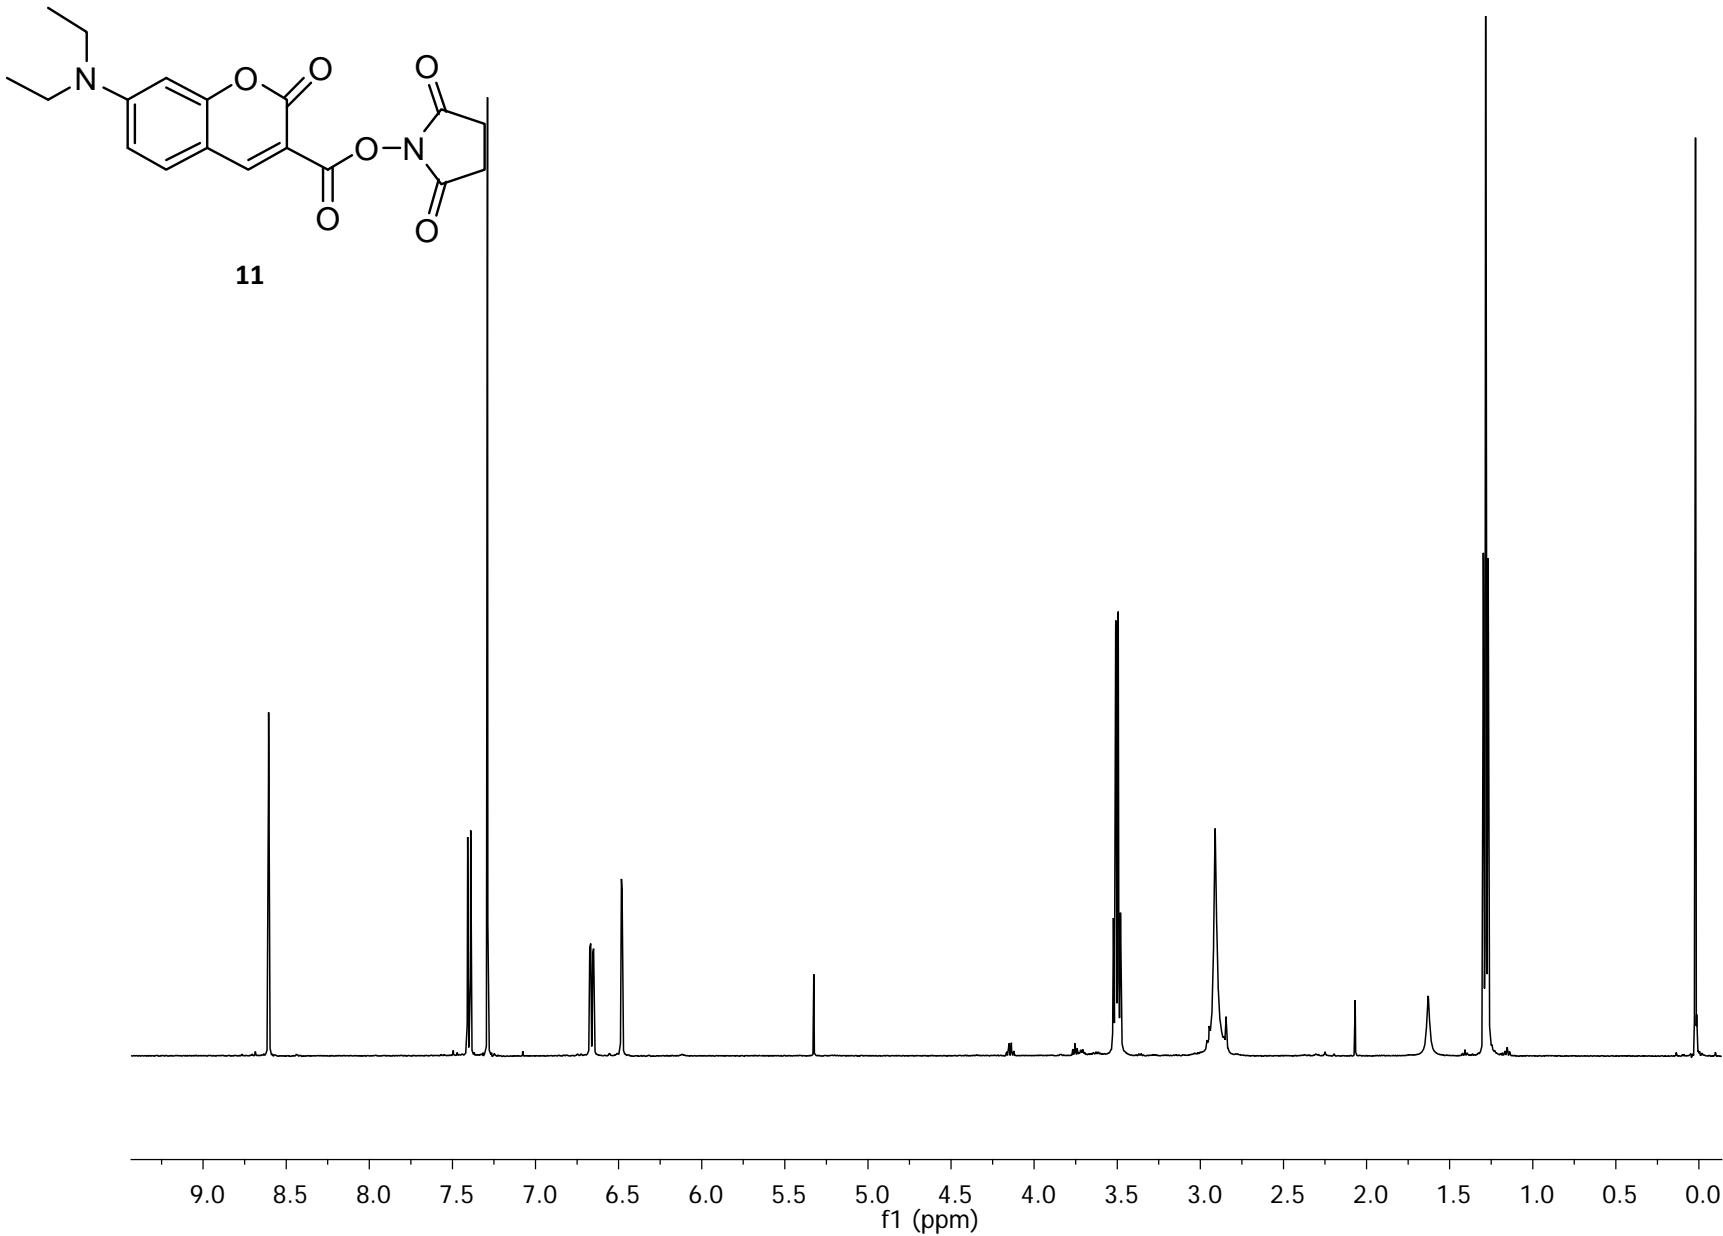

Externally Sensitized Deprotection of PPGs as a Spatial Proximity Probe. Gustafson, T.P.; Metzel, G.A.; Kutateladze, A.G.S10

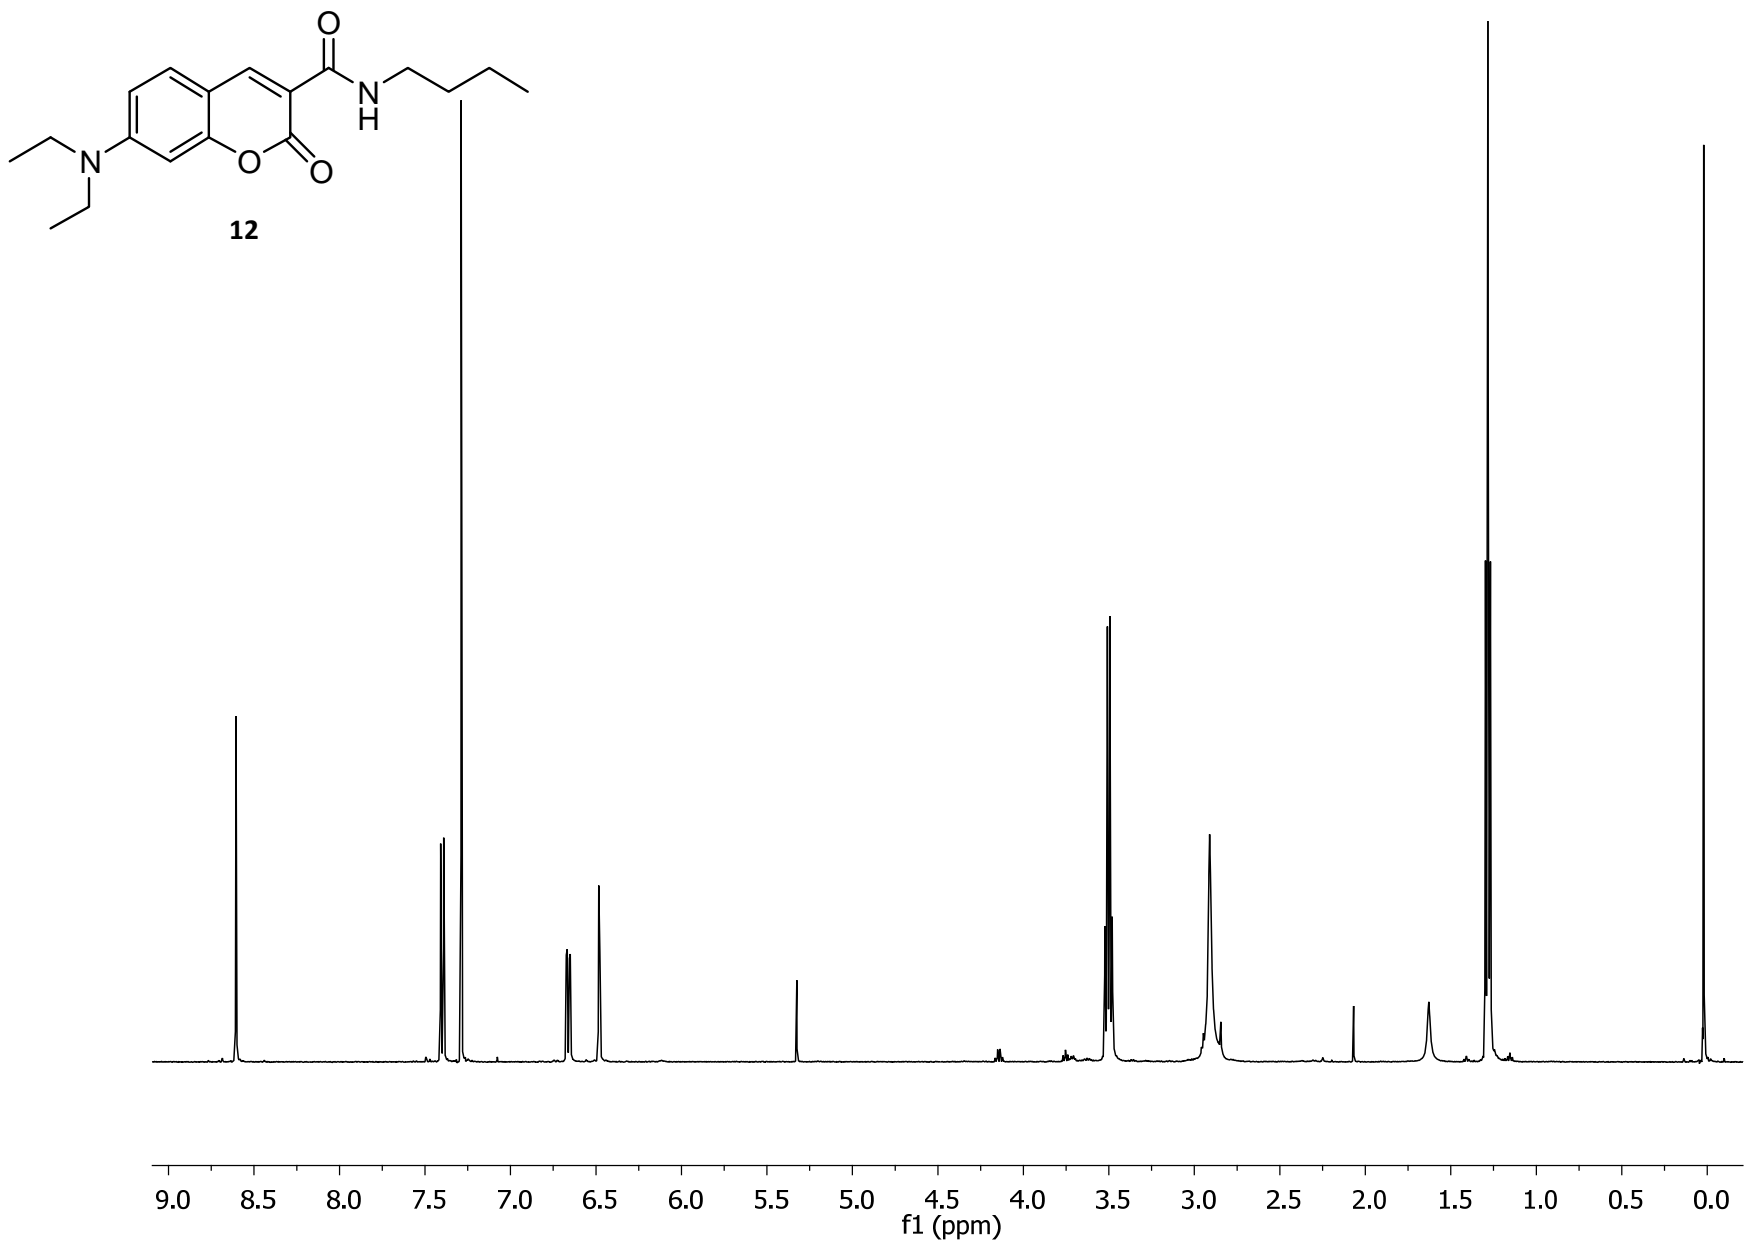

Externally Sensitized Deprotection of PPGs as a Spatial Proximity Probe. Gustafson, T.P.; Metzel, G.A.; Kutateladze, A.G.S11

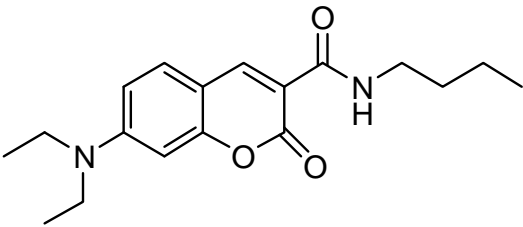

12

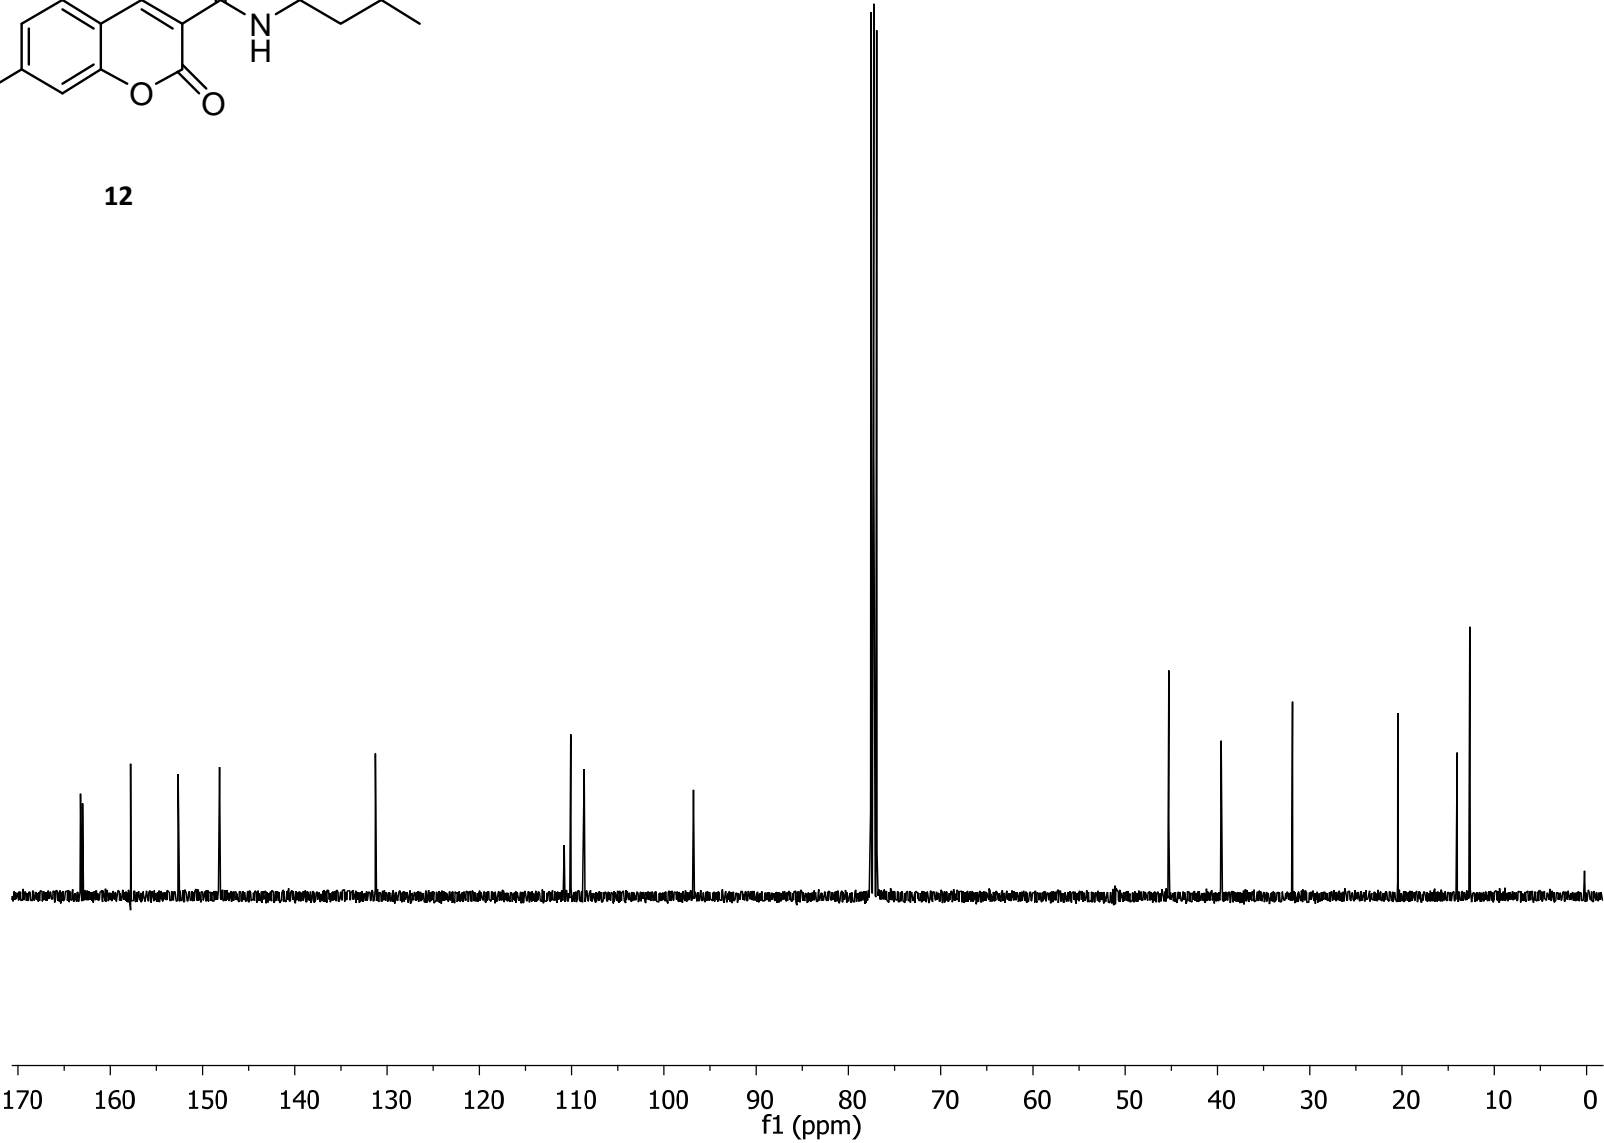

Externally Sensitized Deprotection of PPGs as a Spatial Proximity Probe. Gustafson, T.P.; Metzel, G.A.; Kutateladze, A.G.S12

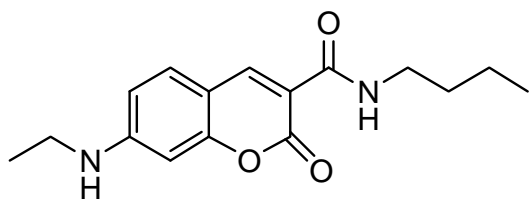

13

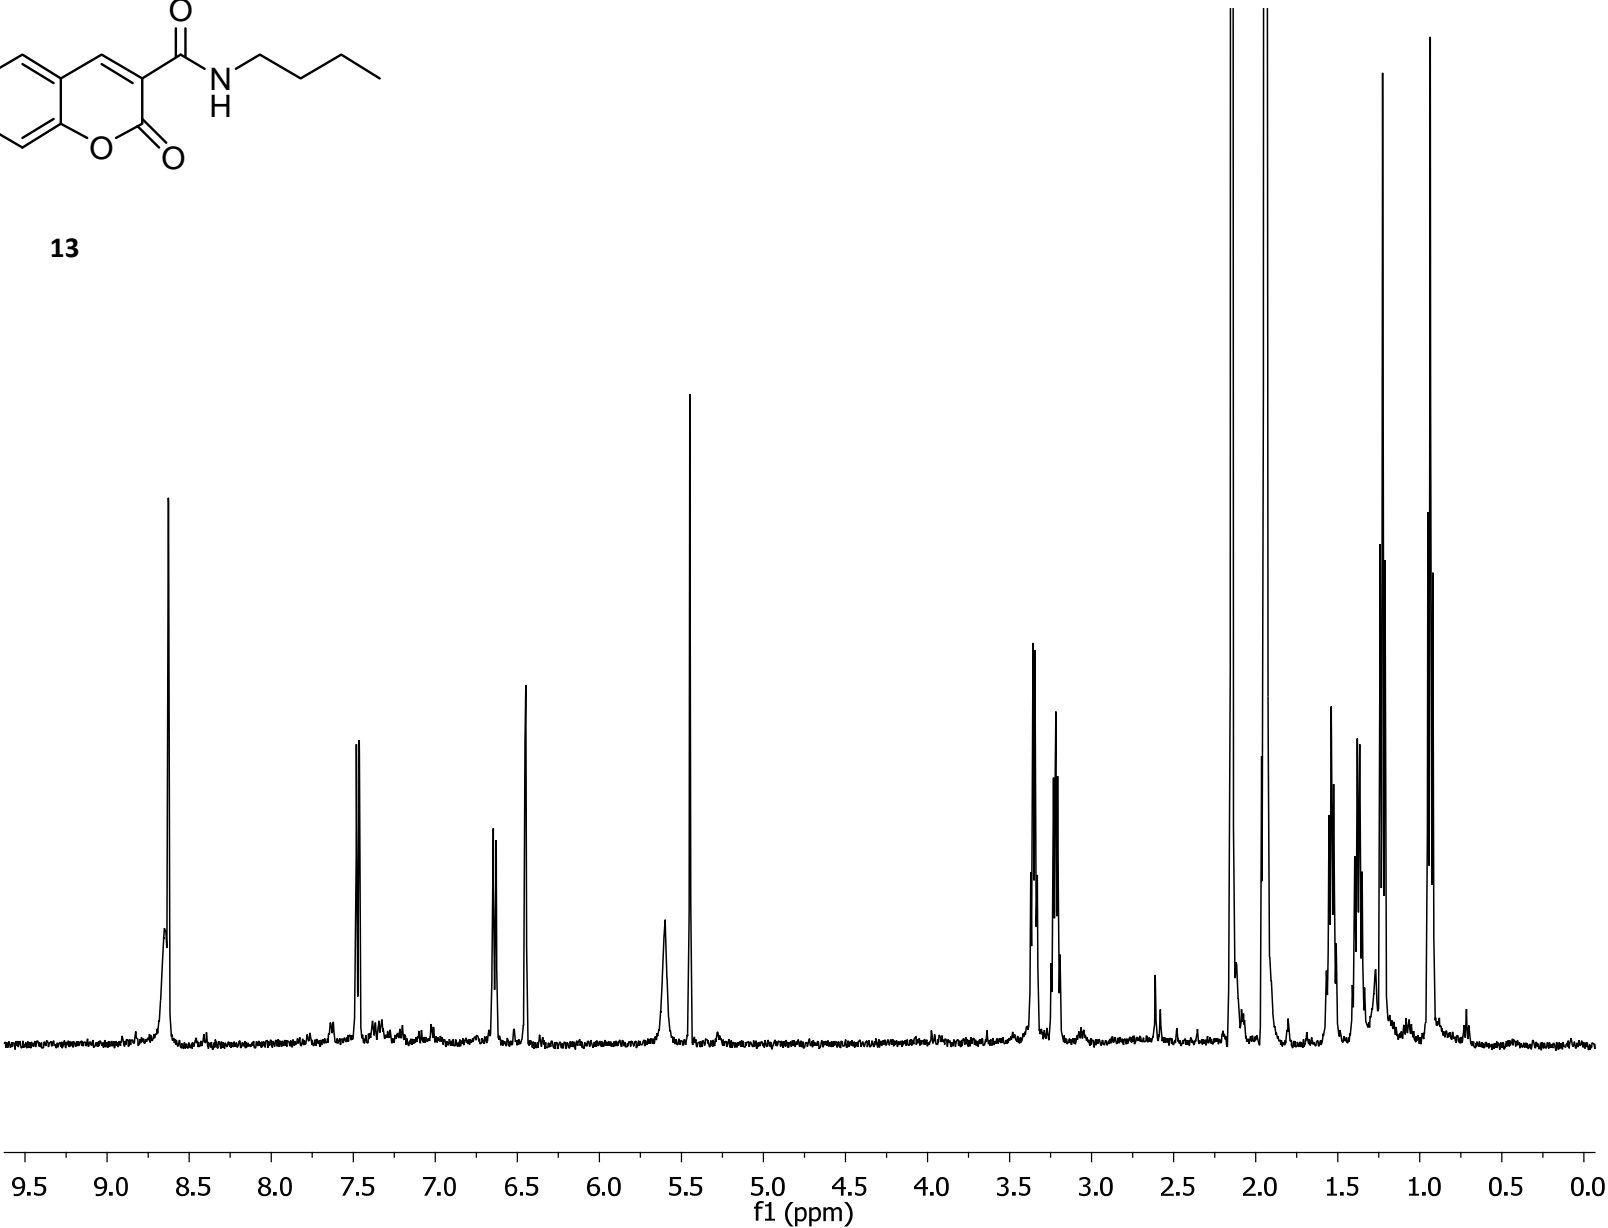

Externally Sensitized Deprotection of PPGs as a Spatial Proximity Probe. Gustafson, T.P.; Metzel, G.A.; Kutateladze, A.G.S13

*NMR* does not detect any ground state binding between *p*-terphenyl and benzophenone in  $\text{CD}_2\text{Cl}_2$

(A) *p*-Terphenyl, 1 mM,  $\text{CD}_2\text{Cl}_2$ ; (C) benzophenone, 1 mM,  $\text{CD}_2\text{Cl}_2$ ; (B) a mixture of 1 mM benzophenone and *p*-terphenyl in  $\text{CD}_2\text{Cl}_2$

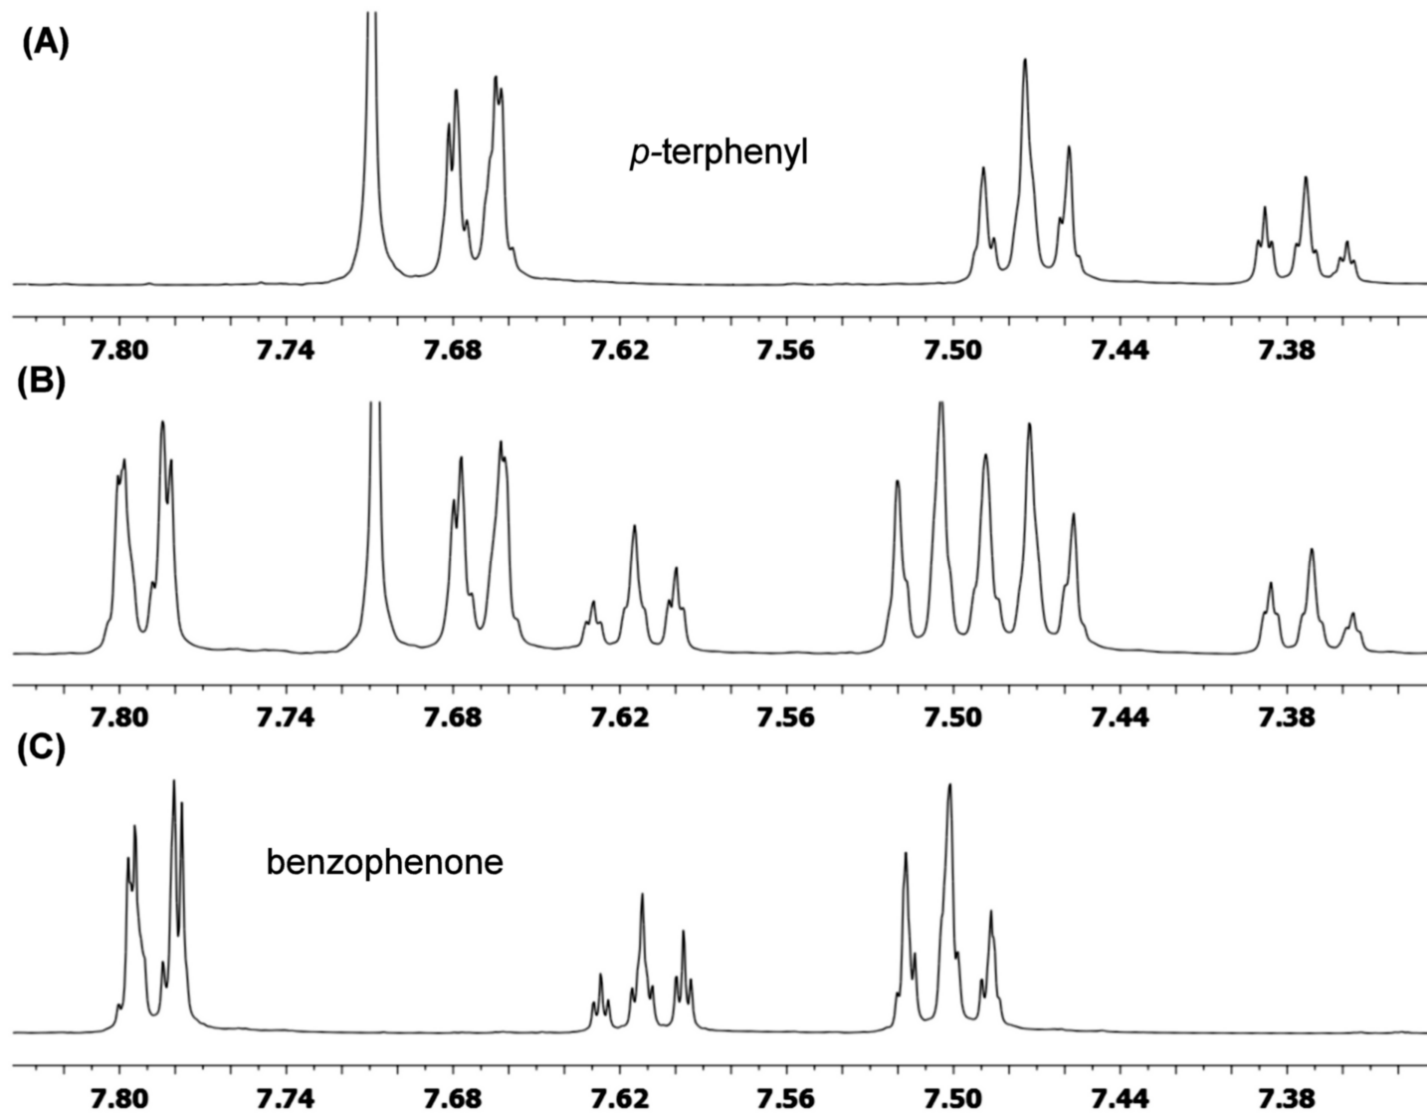

Supplement: c2pp05326h.pdf [file c2pp05326h.pdf]
